# Supplementary material for: Combined spin filtering actions in hybrid magnetic junctions based on organic chains covalently attached to graphene
Source: Royal Society of Chemistry journal article supplement (doi:10.1039/d2nr01917e), 2022-01-01
Supplement: d2nr01917e1.pdf [file d2nr01917e1.pdf]

## Supporting Information

### **Combined spin filtering actions in hybrid magnetic junctions based on organic chains covalently attached to graphene**

*Pascal Martin<sup>1</sup>, Bruno Dlubak<sup>2\*</sup>, Richard Mattana<sup>2</sup>, Pierre Seneor<sup>2</sup>, Marie-Blandine Martin<sup>2</sup>, Théo Henner<sup>2‡</sup>, Florian Godel<sup>2</sup>, Anke Sander<sup>2</sup>, Sophie Collin<sup>2</sup>, Linsai Chen<sup>1</sup>, Stéphan Suffit<sup>3</sup>, François Mallet<sup>3</sup>, Philippe Lafarge<sup>3</sup>, Maria Luisa Della Rocca<sup>3</sup>, Andrea Droghetti<sup>4\*</sup>, Clément Barraud<sup>3\*</sup>*

1. Université Paris Cité, Laboratoire ITODYS, CNRS, UMR 7086, 75013 Paris, France
  2. Unité Mixte de Physique, CNRS, Thales, Université Paris-Saclay, 91767 Palaiseau, France
  3. Université Paris Cité, Laboratoire Matériaux et Phénomènes Quantiques, CNRS, UMR 7162, 75013 Paris, France
  4. School of Physics and CRANN, Trinity College, Dublin 2, Ireland
- E-mail: [clement.barraud@u-paris.fr](mailto:clement.barraud@u-paris.fr)

### Control measurements with only one ferromagnetic electrode

Control junctions with only one ferromagnetic electrode made of Au/NB (1.3 nm)/Co were fabricated and electrically characterized. As shown in Fig. S1, they do not show any magnetoresistive response typically attributed to tunneling anisotropic magnetoresistance<sup>1,2</sup>.

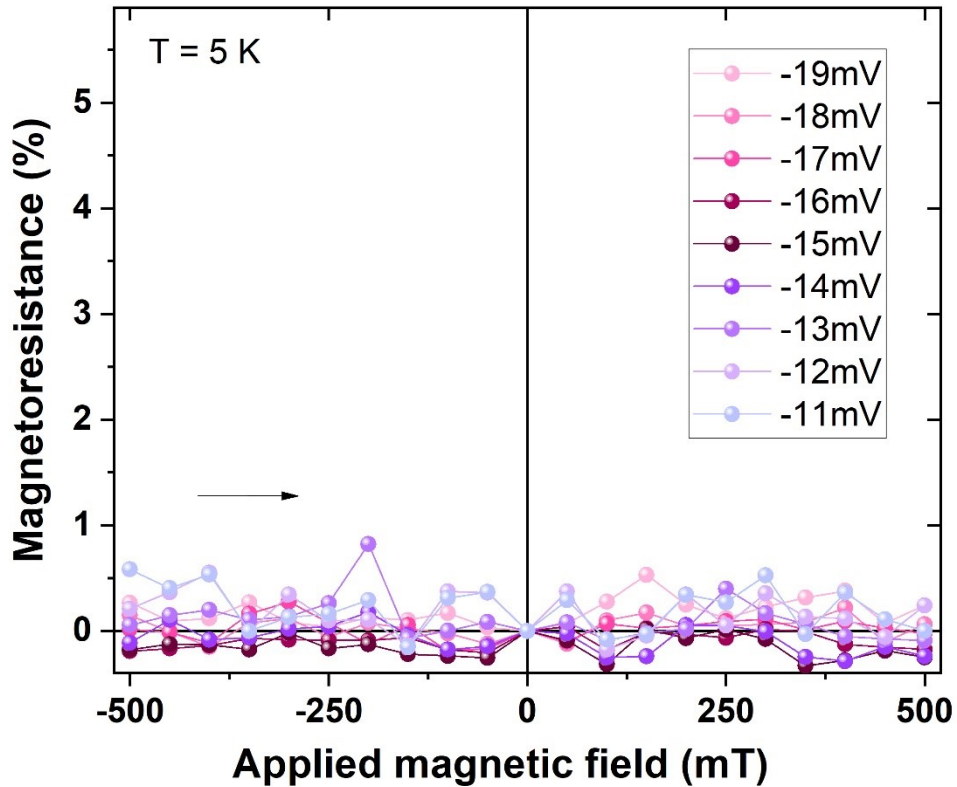

*Fig. S1. Absence of tunneling anisotropic effect in a control Au (50 nm)/NB (1.3 nm)/Co (15 nm) junction. The arrow indicates the sweeping direction. The magnetic field is applied in-plane and along the Au electrodes direction.*

### Additional calculations

Density of states at finite bias voltage

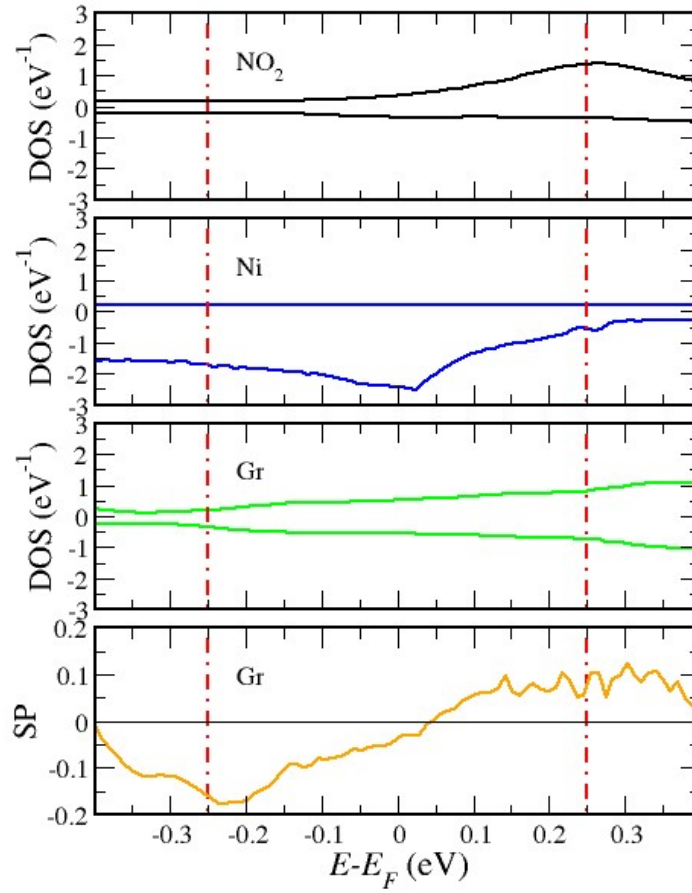

**Fig. S2.** DOS projected over the molecule topmost  $\text{NO}_2$  unit, where the LUMO is localized. DOS projected over a Ni atom of the bottom electrode. Total graphene DOS and graphene spin-polarization  $SP = DOS^\uparrow - DOS^\downarrow$ . Bias voltage = 0.5V.

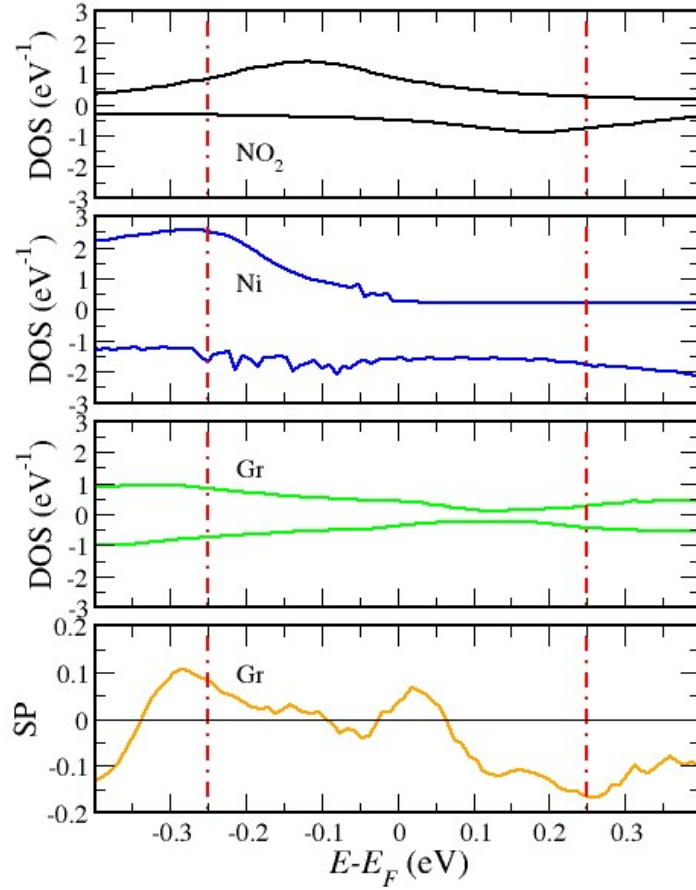

**Fig. S3.** DOS projected over the molecule topmost  $\text{NO}_2$  unit, where the LUMO is localized. DOS projected over a Ni atom. Total graphene DOS and graphene spin-polarization  $SP = DOS^\uparrow - DOS^\downarrow$ . Bias voltage =  $-0.45\text{V}$ .

- 1 M. Grünewald, M. Wahler, F. Schumann, M. Michelfeit, C. Gould, R. Schmidt, F. Würthner, G. Schmidt and L. W. Molenkamp, *Phys. Rev. B*, 2011, **84**, 125208.
- 2 C. Gould, C. Rüster, T. Jungwirth, E. Girgis, G. M. Schott, R. Giraud, K. Brunner, G. Schmidt and L. W. Molenkamp, *Phys. Rev. Lett.*, 2004, **93**, 117203.
